# Supplementary material
Source: HighWire-hosted journal article supplement (https://cmajopen-stage.highwire.org/highwire/filestream/89563/field_highwire_adjunct_files/3/open-2022-0124-1-at.pdf)
Supplement: open-2022-0124-1-at.pdf [file open-2022-0124-1-at.pdf]

## List of Supplemental Materials

**Table S1:** Volume Incentive Thresholds for Patient Enrolment Model Physician Home Visits

**Table S2:** ICES Data Sources

**Table S3:** Codes Used to Identify Palliative Care and Not Palliative Home Visits

**Table S4:** Operational Definitions for all Variables

**Table S5:** Physician-Level Characteristics, Practice Patterns, and Patient Characteristics at Each Home Visit Volume Incentive Threshold, in Ontario, Canada

**Table S6:** Characteristics of Physicians, Practice Patterns, and Patient Characteristics for the Top 1% of Home Visit Physicians Compared to the Bottom 99% of Home Visit Physicians.

**Figure S1.** Count of Home Visits in 2019 for Each Physician, Organized by Cumulative Percent of Home Visit Physicians.

**Figure S2:** Infographic of the Percentile of Home Visit Physicians by Volume and Their Percent Share of Total Home Visits Provided in Ontario in 2019

## References

**Table S1: Volume Incentive Thresholds for Patient Enrolment Model Physician Home Visits.**

Applicable to physicians in patient enrolment models of care (BSM, SJHC, WAHA, RNPGA, SEAMO, HIV, GHC, CCM, FHG, FHN, and FHO) for both rostered and unrostered patients.

Available: <https://www.health.gov.on.ca/en/pro/programs/ohip/bulletins/11000/bul11088.pdf>

<https://www.health.gov.on.ca/en/pro/programs/ohip/bulletins/11000/bul11089.pdf>

| Bonus Level               | Home Visits                   |                               |                                |                                |
|---------------------------|-------------------------------|-------------------------------|--------------------------------|--------------------------------|
|                           | A                             | B                             | C                              | D                              |
| Necessary annual criteria | 3 or more patients served and | 6 or more patients served and | 17 or more patients served and | 32 or more patients served and |
|                           | 12 or more encounters         | 24 or more encounters         | 68 or more encounters          | 128 or more encounters         |
| Annual Bonus              | \$1,500                       | \$3,000                       | \$5,000                        | \$8,000                        |

**Table S2: ICES Data Sources**

| Database name                                                                         | Description                                                                                                                                                                                                                                                                                                                                                                                                  |
|---------------------------------------------------------------------------------------|--------------------------------------------------------------------------------------------------------------------------------------------------------------------------------------------------------------------------------------------------------------------------------------------------------------------------------------------------------------------------------------------------------------|
| <b>Client Agency Program Enrolment Database (CAPE)</b>                                | Links physicians to their enrolled patients under several patient enrolment models of clinical practice. These funding models include enhanced fee for service, non-team capitation, and team-based capitation.(1)                                                                                                                                                                                           |
| <b>Discharge Abstract Database (DAD)</b>                                              | Information on all admissions (excluding designated mental health beds) to acute care hospitals in Ontario. This includes dates of admission as well as diagnostic and procedural codes. Overall, diagnostic codes were found to be 82% sensitive for primary diagnosis when verified against chart abstraction.(2)                                                                                          |
| <b>Home Care Database (HCD)</b>                                                       | Includes all publicly funded home care services, including the service type (end-of-life or not).(3)                                                                                                                                                                                                                                                                                                         |
| <b>ICES Physician Database (IPDB)</b>                                                 | Contains yearly (fiscal) information about all physicians in Ontario. It is used to describe physician characteristics, such as sex, speciality, location, and measures of physician activity (billings, workload, types of services provided).(4)                                                                                                                                                           |
| <b>Immigration Refugees and Citizenship Canada Permanent Resident Database (IRCC)</b> | Contains information on immigrants who have landed in Ontario since 1985.(5)                                                                                                                                                                                                                                                                                                                                 |
| <b>National Ambulatory Care Reporting System (NACRS)</b>                              | Includes information for all emergency department visits since 2000. A re-abstraction study of diagnostic codes found 85% agreement for the main presenting problem.(6)                                                                                                                                                                                                                                      |
| <b>Ontario Health Insurance Plan (OHIP)</b>                                           | Contains information on all billing claims submitted by Ontario physicians (consultations and procedures). Fee for service is the primary method of remuneration for 95% of specialist physicians and 50% of primary care physicians in Ontario. However, physicians practicing in non fee-for-service models submit shadow billings to OHIP, which appear as billing claims with a payment value of \$0.(7) |
| <b>Registered Persons Database (RPDB)</b>                                             | Contains demographic information about anyone who has ever received an Ontario health card number, i.e. all Ontarians alive at any time since 1990 (over 16 million records).(8)                                                                                                                                                                                                                             |

**Table S3: Codes Used to Identify Palliative Care and Not Palliative Home Visits.**

| Type of Home Visit                                                          | Code                   | Descriptor of code                                                     |
|-----------------------------------------------------------------------------|------------------------|------------------------------------------------------------------------|
| <b>Palliative care</b>                                                      | B998                   | Palliative Home Visit - Special visit premium daytime/evenings/weekend |
|                                                                             | B997                   | Palliative Home Visit - Special visit premium nights                   |
|                                                                             | B966                   | Palliative Home Visit- Travel premium                                  |
|                                                                             | A777                   | Pronouncement of death                                                 |
|                                                                             | A902                   | House call to pronounce death                                          |
|                                                                             | A905                   | General/Family practice - Limited consultation                         |
|                                                                             | A945                   | General/Family Practice - Special palliative care consultation         |
|                                                                             | G512                   | Palliative care case management fee                                    |
| <b>Not palliative</b> (used for home care services group and 'other' group) | A901                   | House call assessment (in FP/GP section)                               |
|                                                                             | A900                   | Complex house call assessment- for "frail elderly or housebound"       |
|                                                                             | B960, B990, B961, B992 | Home visit Special visit premiums daytime                              |
|                                                                             | B962, B994, B964, B996 | Home visit Special visit premiums evenings and nights                  |
|                                                                             | B963, B993             | Home visit Special visit premiums Weekends and holidays                |

Note. Home visits were first classified as palliative if any palliative codes were present

**Table S4:** Operational Definitions for all Variables.

| <b>Physician Characteristics</b>                      |                    |                                                                                                                                                                                                                                                                                                                   |
|-------------------------------------------------------|--------------------|-------------------------------------------------------------------------------------------------------------------------------------------------------------------------------------------------------------------------------------------------------------------------------------------------------------------|
| <b>Variable</b>                                       | <b>Data Source</b> | <b>Definition</b>                                                                                                                                                                                                                                                                                                 |
| Physician age                                         | IPDB               | Age in years                                                                                                                                                                                                                                                                                                      |
| Physician sex                                         | IPDB               | Male<br>Female                                                                                                                                                                                                                                                                                                    |
| Canada medical graduate                               | IPDB               | “CMG” variable in IPDB categorized as:<br>Yes<br>No<br>Missing                                                                                                                                                                                                                                                    |
| Physician urban/rural practice                        | IPDB               | Postal code converted to RIO score(16)<br>0: large urban (metropolitan areas)<br>1-9: medium urban<br>10-39: small urban<br>40+: rural                                                                                                                                                                            |
| Physician specialty                                   | IPDB               | MAINSPECIALTY variable indicates practice specialty of physician.                                                                                                                                                                                                                                                 |
| Physician medical home enrolment                      | CAPE               | Whether the physician is part of a medical home (primary care enrolment model), or not.                                                                                                                                                                                                                           |
| Physician compensation model                          | CAPE, IPDB         | The type of patient enrolment model the physician belongs to. Categories are:<br>Team-Based (Family health team)<br>Capitation (Family health network or family health organization)<br>Enhanced Fee-For-Service (Comprehensive care model or family health group)<br>Other (all other models)<br>Fee-For-Service |
| <b>Physician-Level Home Visit Volumes and Payment</b> |                    |                                                                                                                                                                                                                                                                                                                   |
| Number of home visits                                 | OHIP               | Count of all home visits provided in the 365 days after the index home visits.                                                                                                                                                                                                                                    |
| Number of unique patients seen                        | OHIP               | Count of unique patients seen in subsequent 365 days after randomly selected index home visits.                                                                                                                                                                                                                   |
| Patients seen per day on a day doing home visits      | OHIP               | Median number of patients seen on a day doing home visits, in the 365 days following the index home visit.                                                                                                                                                                                                        |
| Number of home visits per patient                     | OHIP               | Ratio between the count of all home visits in subsequent 365 days after randomly selected index home visits, divided by the count of unique patients seen in home visits.                                                                                                                                         |
| Home visit income (% total)                           | OHIP               | Proportion of total billings (\$) that are generated by home visit codes in the 365 days after the index home visit.                                                                                                                                                                                              |
| Proportion of ‘off-hours’ home visits                 | OHIP               | Proportion of home visits in the 365 days following the index home visit that are accompanied by an off-hours premium code (B997, B987, B962, B994, B964, B996, B963, B993).                                                                                                                                      |

| Physician-Level Patient Characteristics                                                           |                    |                                                                                                                                                                                                                                                |
|---------------------------------------------------------------------------------------------------|--------------------|------------------------------------------------------------------------------------------------------------------------------------------------------------------------------------------------------------------------------------------------|
| Variable                                                                                          | Data Source        | Definition                                                                                                                                                                                                                                     |
| Median patient age                                                                                | RPDB, OHIP         | Median patient age in the 365 days following the index home (or office) visit. Categorized as:<br><18 years (children)<br>18-39 years (young adult)<br>40-64 years (middle aged)<br>65-79 years (younger seniors)<br>80+ years (older seniors) |
| Proportion of patients aged 65 or older                                                           | RPDB, OHIP         | Proportion of patients aged 65 or older at the time of the index home (or office) visit.                                                                                                                                                       |
| Median patient healthcare resource utilization                                                    | DAD, NACRS, OHIP   | Using Resource Utilization Bands (RUBs), per the Johns Hopkins ACG® System Version 7, in 2 years prior to the index date.(18) Categorized as:<br>Low (0-2)<br>Moderate (3)<br>High (4-5)                                                       |
| Proportion of patients in a lower income neighborhood                                             | RPDB, Census, OHIP | Proportion of patients with nearest census-based income quintile of 1 or 2 based on postal code (based on 2016 census).                                                                                                                        |
| Proportion of large urban patients                                                                | RPDB, OHIP         | Proportion of all home (or office) visits with patients who reside in a large urban location. Postal code converted to RIO score(16)<br>0: large urban/metropolitan                                                                            |
| Proportion of recent immigrant patients                                                           | IRCC, OHIP         | Present in the CIC (IRCC) database and landing date is within the past 10 years of index visit.                                                                                                                                                |
| Proportion of home visits made to patients who are rostered to them personally                    | CAPE, OHIP         | Using macro getpcprovider.sas, count of each physician's home visits to their own rostered patients in the 365 days following the index home visit.                                                                                            |
| Proportion of home visits made to their own rostered patients or to their group                   | CAPE, OHIP         | Using macro getpcprovider.sas, count of each physician's home visits to patients who are rostered and have a group number that matches the physicians' group number in the 365 days following the index home visit.                            |
| Proportion of patients previously known in the prior 2 years                                      | OHIP               | Proportion of patients with whom a physician has had any encounter with in the previous 2 years in any setting, other than the index encounter.                                                                                                |
| Proportion of patients not in a medical home                                                      | CAPE, OHIP         | Proportion of patients not enrolled in a medical home at first encounter.                                                                                                                                                                      |
| Proportion of home visits made to patients who received 2+ home care visits in the previous month | HCD, OHIP          | Count of home visits in the subsequent 365 days after the index visit where the patient had at least 2 home care visits in the 30 days before the home visit.                                                                                  |
| Proportion of home visits that were palliative                                                    | OHIP               | Count of home visits in the subsequent 365 days after the index visit that were palliative (Appendix Table 3).                                                                                                                                 |
| Proportion of home visits that were neither home care nor palliative ('other')                    | OHIP               | Count of home visits in the subsequent 365 days of the index visit that were 'other' home visits (Appendix Table 3).                                                                                                                           |

Note. Unless otherwise stated, variables are measured between January 1<sup>st</sup>, 2019 and December 31<sup>st</sup>, 2019.

**Table S5:** Physician-Level Characteristics, Practice Patterns, and Patient Characteristics at Each Home Visit Volume Incentive Threshold, in Ontario, Canada.

| Physician Characteristics                                      | At least 1 home visit and 3 or fewer patients (N = 3,530) | At least 12 home visits and at least 3 patients (N = 973) | At least 24 home visits and at least 6 patients (N = 1,104) | At least 68 home visits and at least 17 patients (N = 385) | At least 128 home visits and at least 32 patients (N = 580) | p-value** |
|----------------------------------------------------------------|-----------------------------------------------------------|-----------------------------------------------------------|-------------------------------------------------------------|------------------------------------------------------------|-------------------------------------------------------------|-----------|
| Physician age, median (IQR)                                    | 50 (38-60)                                                | 50 (38-59)                                                | 52 (39-60)                                                  | 52 (39-62)                                                 | 50 (37-61)                                                  | 0.324     |
| Physician female sex, n (%)                                    | 1,719 (48.7)                                              | 443 (45.5)                                                | 473 (42.8)                                                  | 152 (39.5)                                                 | 221 (38.1)                                                  | <.001     |
| Canada medical graduate, n (%)                                 | 2,111 (59.8)                                              | 591 (60.7)                                                | 701 (63.5)                                                  | 223 (57.9)                                                 | 338 (58.3)                                                  | 0.383     |
| Physician urban/rural practice <sup>a</sup>                    |                                                           |                                                           |                                                             |                                                            |                                                             | <.001     |
| Large urban                                                    | 1,597 (45.2)                                              | 408 (41.9)                                                | 428 (38.8)                                                  | 158 (41)                                                   | 280 (48.3)                                                  |           |
| Medium urban                                                   | 944 (26.7)                                                | 220 (22.6)                                                | 268 (24.3)                                                  | 106 (27.5)                                                 | 159 (27.4)                                                  |           |
| Small urban                                                    | 645 (18.3)                                                | 238 (24.5)                                                | 282 (25.5)                                                  | 90 (23.4)                                                  | 109 (18.8)                                                  |           |
| Rural                                                          | 319 (9)                                                   | 100 (10.3)                                                | 123 (11.1)                                                  | 29 (7.5)                                                   | 27 (4.7)                                                    |           |
| Physician medical home enrolment, n (%)                        | 2,964 (84)                                                | 871 (89.5)                                                | 967 (87.6)                                                  | 322 (83.6)                                                 | 390 (67.2)                                                  | <.001     |
| Physician compensation model, n (%)                            |                                                           |                                                           |                                                             |                                                            |                                                             | <.001     |
| Capitation                                                     | 761 (21.6)                                                | 225 (23.1)                                                | 252 (22.8)                                                  | 85 (22.1)                                                  | 91-93 (15.7-16) *                                           |           |
| Team                                                           | 1,064 (30.1)                                              | 344 (35.4)                                                | 370 (33.5)                                                  | 111 (28.8)                                                 | 99 (17.1)                                                   |           |
| Enhanced Fee for Service                                       | 1,100 (31.2)                                              | 292 (30)                                                  | 338 (30.6)                                                  | 126 (32.7)                                                 | 195 (33.6)                                                  |           |
| Fee-for-Service                                                | 566 (16)                                                  | 102 (10.5)                                                | 137 (12.4)                                                  | 63 (16.4)                                                  | 190 (32.8)                                                  |           |
| Other                                                          | 39 (1.1)                                                  | 10 (1)                                                    | 7 (0.6)                                                     | 0                                                          | <=5 *                                                       |           |
| Number of home visits, median (IQR)                            | 3 (1-6)                                                   | 16 (14-20)                                                | 39 (30-50)                                                  | 92 (79-115)                                                | 289.5 (175.5-528)                                           | -         |
| Unique home visit patients, median (IQR)                       | 2 (1-4)                                                   | 8 (6-11)                                                  | 16 (12-23)                                                  | 35 (26-48)                                                 | 83.5 (54-159)                                               | <.001     |
| Number of home visits per patient, median (IQR)                | 1 (1-1.7)                                                 | 2 (1.5-2.7)                                               | 2.4 (1.8-3.2)                                               | 2.6 (1.9-3.6)                                              | 3.3 (2.3-4.9)                                               | <.001     |
| Home visit income (% total), median (IQR)                      | 0.3 (0.1-0.8)                                             | 1.6 (0.8-3.4)                                             | 3.7 (1.8-7.2)                                               | 8 (4.3-13.7)                                               | 22.1 (11.1-42.1)                                            | <.001     |
| Patients seen per day on a day doing home visits, median (IQR) | 1 (1-1)                                                   | 1 (1-1)                                                   | 1 (1-1)                                                     | 1 (1-2)                                                    | 2 (2-4)                                                     | <.001     |
| Percentage of 'off-hours' home visits, median (IQR)            | 14.3 (0-66.7)                                             | 21.1 (5.6-57.1)                                           | 15.9 (3.8-58.3)                                             | 14.9 (3.4-51.5)                                            | 15.4 (3.8-76.5)                                             | <.001     |

| Physician-Level Patient Characteristics                                                                                  | At least 1 home visit and 3 or fewer patients (N = 3,530) | At least 12 home visits and at least 3 patients (N = 973) | At least 24 home visits and at least 6 patients (N = 1,104) | At least 68 home visits and at least 17 patients (N = 385) | At least 128 home visits and at least 32 patients (N = 580) | p-value** |
|--------------------------------------------------------------------------------------------------------------------------|-----------------------------------------------------------|-----------------------------------------------------------|-------------------------------------------------------------|------------------------------------------------------------|-------------------------------------------------------------|-----------|
| <b>Median patient's age, n (%)</b>                                                                                       |                                                           |                                                           |                                                             |                                                            |                                                             | <.001     |
| <18 years                                                                                                                | 71 (2)                                                    | 8 (0.8)                                                   | 8 (0.7)                                                     | 8 (2.1)                                                    | 15 (2.6)                                                    |           |
| 18 - 39 years                                                                                                            | 149 (4.2)                                                 | 21 (2.2)                                                  | 15 (1.4)                                                    | 6 (1.6)                                                    | 8 (1.4)                                                     |           |
| 40 - 64 years                                                                                                            | 503 (14.2)                                                | 62 (6.4)                                                  | 83 (7.5)                                                    | 34 (8.8)                                                   | 56 (9.7)                                                    |           |
| 65 - 79 years                                                                                                            | 968 (27.4)                                                | 243 (25)                                                  | 244 (22.1)                                                  | 86 (22.3)                                                  | 211 (36.4)                                                  |           |
| 80+ years                                                                                                                | 1,839 (52.1)                                              | 639 (65.7)                                                | 754 (68.3)                                                  | 251 (65.2)                                                 | 290 (50)                                                    |           |
| <b>Percentage of patients aged 65 or older, median (IQR)</b>                                                             | 100 (62.5-100)                                            | 91.7 (76.2-100)                                           | 91.9 (75.6-98.1)                                            | 90.1 (73.3-97.7)                                           | 84.4 (67.1-95.8)                                            | <.001     |
| <b>Median patient healthcare resource utilization in subsequent year, n (%)</b>                                          |                                                           |                                                           |                                                             |                                                            |                                                             | <.001     |
| Low (0 - 2)                                                                                                              | 118 (3.3)                                                 | <=5 *                                                     | 0                                                           | 0                                                          | 0                                                           |           |
| Moderate (3)                                                                                                             | 791 (22.4)                                                | 139-141 (14.3-14.5) *                                     | 120 (10.9)                                                  | 43 (11.2)                                                  | 53 (9.1)                                                    |           |
| High (4 - 5)                                                                                                             | 2,621 (74.2)                                              | 829 (85.2)                                                | 984 (89.1)                                                  | 342 (88.8)                                                 | 527 (90.9)                                                  |           |
| <b>Percentage of patients in a lower income neighborhood, median (IQR)</b>                                               | 33.3 (0-85.7)                                             | 39.1 (16.7-64.3)                                          | 41.7 (20.5-65.4)                                            | 43.4 (25.2-61.8)                                           | 45.7 (26.7-57)                                              | <.001     |
| <b>Percentage of large urban patients, median (IQR)</b>                                                                  | 0 (0-100)                                                 | 8.3 (0-100)                                               | 6.7 (0-94.6)                                                | 15.8 (0-94.7)                                              | 36.4 (0.9-96.3)                                             | <.001     |
| <b>Percentage of recent immigrant patients<sup>c</sup>, median (IQR)</b>                                                 | 0 (0-0)                                                   | 0 (0-0)                                                   | 0 (0-0)                                                     | 0 (0-1)                                                    | 0 (0-2.2)                                                   | <.001     |
| <b>Percentage of home visits made to patients who are rostered to them personally, median (IQR)</b>                      | 80.0 (0-100)                                              | 82.6 (47.8-100)                                           | 75.4 (21.2-93.5)                                            | 57.5 (1.8-87.5)                                            | 3.7 (0-67.3)                                                | <.001     |
| <b>Percentage of home visits made to their own rostered patients or to their group, median (IQR)</b>                     | 100 (33.3-100)                                            | 87.5 (58.3-100)                                           | 80.2 (29.8-96)                                              | 63.6 (5.8-90.4)                                            | 11.5 (0-72.7)                                               | <.001     |
| <b>Percentage of patients previously known to them in the prior 2-years, median (IQR)</b>                                | 100 (77.8-100)                                            | 100 (88.9-100)                                            | 96.4 (84.6-100)                                             | 89.6 (64.5-98.6)                                           | 77.4 (39.2-95.7)                                            | <.001     |
| <b>Percentage of patients not in a medical home, median (IQR)</b>                                                        | 0 (0-28.6)                                                | 10 (0-25)                                                 | 12.5 (3.6-32)                                               | 18.2 (7.7-36.7)                                            | 24.8 (14.7-38.8)                                            | <.001     |
| <b>Percentage of home visits made to patients who received 2+ home care visits in the previous 30 days, median (IQR)</b> | 62.5 (0-100)                                              | 62.5 (41.7-81.3)                                          | 58.8 (40.7-74.4)                                            | 55 (38.8-72.2)                                             | 56.8 (35.2-80.3)                                            | 0.003     |
| <b>Percentage of home visits that were palliative, median (IQR)</b>                                                      | 0 (0-50)                                                  | 9.5 (0-43.8)                                              | 10.7 (0-37.7)                                               | 8 (0.9-40.5)                                               | 13.1 (0.2-93.6)                                             | <.001     |



|                                                                                                     |             |                  |                  |                |                 |       |
|-----------------------------------------------------------------------------------------------------|-------------|------------------|------------------|----------------|-----------------|-------|
| <b>Percentage of home visits that were neither home care not palliative ('other'), median (IQR)</b> | 22.2 (0-75) | 29.4 (12.5-53.8) | 34.7 (18.1-55.3) | 39.1 (20-56.7) | 35.9 (2.3-62.4) | <.001 |
|-----------------------------------------------------------------------------------------------------|-------------|------------------|------------------|----------------|-----------------|-------|

*Note.* Measured from January 1st, 2019 to December 31st, 2019. Physician specialty restricted to family/general practice and family/emergency medicine. Thresholds from <https://www.health.gov.on.ca/en/pro/programs/ohip/bulletins/11000/bul11088.pdf>. If a physician did not meet both the visit count and patient count criteria for a category, they were put into the next lowest category.

\* Cells adjusted to prevent re-identification of groups <6 individuals.

\*\* p-values obtained using Kruskal-Wallis test for median (IQR) variables, and Chi-square for categorical variables.

<sup>a</sup> RIO score cut-offs were 0 large urban, 1-9 medium urban, 10-39 small urban, and 40+ rural. Total n missing = 60.

<sup>b</sup> 'Off-hours' was defined as a visit occurring between 5pm and 7am on weekdays or anytime on Saturday/Sunday and public holidays.

<sup>c</sup> 'Recent' was defined as within the past 10 years.

**Table S6:** Characteristics of Physicians, Practice Patterns, and Patient Characteristics for the Top 1% of Home Visit Physicians Compared to the Bottom 99% of Home Visit Physicians.

| Physician Characteristics                                                         | Top 1% of Home Visit Physicians<br>N = 66           | Bottom 99% of Home Visit Physicians<br>N = 6,506      | Standardized Mean Difference        |
|-----------------------------------------------------------------------------------|-----------------------------------------------------|-------------------------------------------------------|-------------------------------------|
| <b>Physician age (years)</b>                                                      |                                                     |                                                       |                                     |
| Median (IQR)                                                                      | 50.5 (40-59)                                        | 50 (38-60)                                            | 0.05                                |
| <b>Self-reported physician gender, n (%)</b>                                      |                                                     |                                                       |                                     |
| "Female"                                                                          | 20 (30.3)                                           | 2,988 (45.9)                                          | 0.33                                |
| <b>Canada medical graduate, n (%)</b>                                             |                                                     |                                                       |                                     |
| Yes                                                                               | 35 (53.0)                                           | 3,929 (60.4)                                          | 0.15                                |
| Missing                                                                           | 10 (15.2)                                           | 1,279 (19.7)                                          | 0.12                                |
| <b>Physician urban/rural practice, n (%)<sup>a</sup></b>                          |                                                     |                                                       |                                     |
| Large urban                                                                       | 30-32 (45.5-48.5) *                                 | 2,839 (43.6)                                          | 0.10                                |
| Medium urban                                                                      | 22 (33.3)                                           | 1,675 (25.7)                                          | 0.17                                |
| Small urban                                                                       | 9 (13.6)                                            | 1,355 (20.8)                                          | 0.19                                |
| Rural                                                                             | <=5 *                                               | 595 (9.1)                                             | 0.18                                |
| Missing                                                                           | 0                                                   | 42 (0.6)                                              | 0.11                                |
| <b>Physician medical home enrolment, n (%)</b>                                    | 47 (71.2)                                           | 5,467 (84.0)                                          | 0.31                                |
| <b>Physician compensation model, n (%)</b>                                        |                                                     |                                                       |                                     |
| Capitation                                                                        |                                                     | 1,415 (21.5) *                                        | 0.41                                |
| Team-based                                                                        |                                                     | 1,988 (30.2) *                                        | 0.67                                |
| Enhanced fee for service                                                          | 38 (57.6)                                           | 2,013 (30.9)                                          | 0.56                                |
| Fee for service                                                                   | 19 (28.8)                                           | 1,039 (16.0)                                          | 0.31                                |
| Other                                                                             | 0                                                   | 60 (0.9)                                              | 0.14                                |
| <b>Physician-Level Home Visit Volumes and Payment</b>                             | <b>High-Volume Home Visit Physicians<br/>N = 66</b> | <b>Low-Volume Home Visit Physicians<br/>N = 6,506</b> | <b>Standardized Mean Difference</b> |
| <b>Number of home visits, median (IQR)</b>                                        | 1,337 (1,100-1,802)                                 | 9 (3-34)                                              | 2.48                                |
| <b>Number of unique home visit patients seen, median (IQR)</b>                    | 270 (166-1,032)                                     | 5 (2-15)                                              | 2.44                                |
| <b>Patients seen per day on a day doing home visits, median (IQR)</b>             | 7 (5-9)                                             | 1 (1-1)                                               | 3.85                                |
| <b>Number of home visits per patient, median (IQR)</b>                            | 5.3 (1.4-8.4)                                       | 1.7 (1-2.6)                                           | 0.91                                |
| <b>Home visits income (% total billing), median (IQR)</b>                         | 47 (33.1-66.1)                                      | 1 (0.2-3.9)                                           | 2.35                                |
| <b>Percentage of home visits that are off-hours<sup>b</sup> (%), median (IQR)</b> | 52.8 (9.2-90.7)                                     | 16.7 (0-66.7)                                         | 0.57                                |
| <b>Physician-Level Home Visit Patient Characteristics</b>                         | <b>High-Volume Home Visit Physicians<br/>N = 66</b> | <b>Low-Volume Home Visit Physicians<br/>N = 6,506</b> | <b>Standardized Mean Difference</b> |
| <b>Median patient age (years), n (%)</b>                                          |                                                     |                                                       |                                     |
| <18 years                                                                         |                                                     | 110 (1.7) *                                           | 0.09                                |
| 18 - 39 years                                                                     |                                                     | 199 (3.0) *                                           | 0                                   |
| 40 - 64 years                                                                     | 16 (24.2)                                           | 722 (11.1)                                            | 0.35                                |

Appendix 1, as supplied by the authors. Appendix to: Salahub C, Kiran T, Na Y, et al. Characteristics and practice patterns of family physicians who provide home visits in Ontario, Canada: a cross-sectional study. *CMAJ Open* 2023. doi: 10.9778/cmajo.20220124. Copyright © 2023 The Author(s) or their employer(s). To receive this resource in an accessible format, please contact us at [cmajgroup@cmaj.ca](mailto:cmajgroup@cmaj.ca).

|                                                                                                                              |                  |                 |      |
|------------------------------------------------------------------------------------------------------------------------------|------------------|-----------------|------|
| 65 - 79 years                                                                                                                | 22 (33.3)        | 1,730 (26.6)    | 0.15 |
| 80+ years                                                                                                                    | 24 (36.4)        | 3,749 (57.6)    | 0.44 |
| <b>Percentage of patients aged 65 years or older (%), median (IQR)</b>                                                       | 71.2 (47-91.1)   | 95.6 (70-100)   | 0.88 |
| <b>Median patient healthcare resource utilization band, n (%)</b>                                                            |                  |                 |      |
| Low (0 - 2)                                                                                                                  | 0                | 122 (1.9)       | 0.20 |
| Moderate (3)                                                                                                                 | 12 (18.2)        | 1,135 (17.4)    | 0.02 |
| High (4 - 5)                                                                                                                 | 54 (81.8)        | 5,249 (80.7)    | 0.03 |
| <b>Percentage of patients in a lower income neighborhood (%), median (IQR)</b>                                               | 49.8 (38.1-57.5) | 37.8 (5-70)     | 0.35 |
| <b>Percentage of large urban patients (%), median (IQR)</b>                                                                  | 44.6 (1.6-94.1)  | 7.6 (0-100)     | 0.24 |
| <b>Percentage of recent immigrant patients<sup>c</sup> (%), median (IQR)</b>                                                 | 1 (0-2.9)        | 0               | 1.48 |
| <b>Percentage of home visits made to patients who are enrolled to them personally (%), median (IQR)</b>                      | 0.3 (0-19.2)     | 75 (0-100)      | 0.96 |
| <b>Percentage of home visits made to their own or to their group enrolled patients (%), median (IQR)</b>                     | 3.7 (0-28)       | 85.7 (20.6-100) | 1.16 |
| <b>Percentage of patients previously known in the prior 2 years (%), median (IQR)</b>                                        | 63.4 (28.2-86.6) | 100 (77.8-100)  | 1.33 |
| <b>Percentage of patients not in a medical home (%), median (IQR)</b>                                                        | 34.3 (23.9-39.1) | 5.3 (0-31.1)    | 1.16 |
| <b>Percentage of home visits made to patients who received 2+ home care visits in the previous 30 days (%), median (IQR)</b> | 38.9 (26.1-71)   | 60 (28.6-86.7)  | 0.39 |
| <b>Percentage of home visits that were palliative (%), median (IQR)</b>                                                      | 0.8 (0-54.3)     | 4 (0-50)        | 0.07 |
| <b>Percentage of home visits that were neither home care nor palliative (%), median (IQR)</b>                                | 55.6 (20.3-72.8) | 29.6 (0-61.6)   | 0.39 |

Note. Unless otherwise stated, variables are measured between January 1st, 2019 and December 31st, 2019. Standardized mean differences greater than or equal to 10% (0.1) are considered meaningful.

\* Cells adjusted or combined to prevent re-identification of groups < 6 individuals.

<sup>a</sup> RIO score cut-offs were 0 large urban, 1-9 medium urban, 10-39 small urban, and 40+ rural.

<sup>b</sup> 'Off-hours' was defined as a visit occurring between 5pm and 7am on weekdays or anytime on Saturday/Sunday and public holidays.

<sup>c</sup> 'Recent' was defined as within the past 10 years.

**Figure S1:** Count of Home Visits in 2019 for Each Physician, Organized by Cumulative Percent of Home Visit Physicians.

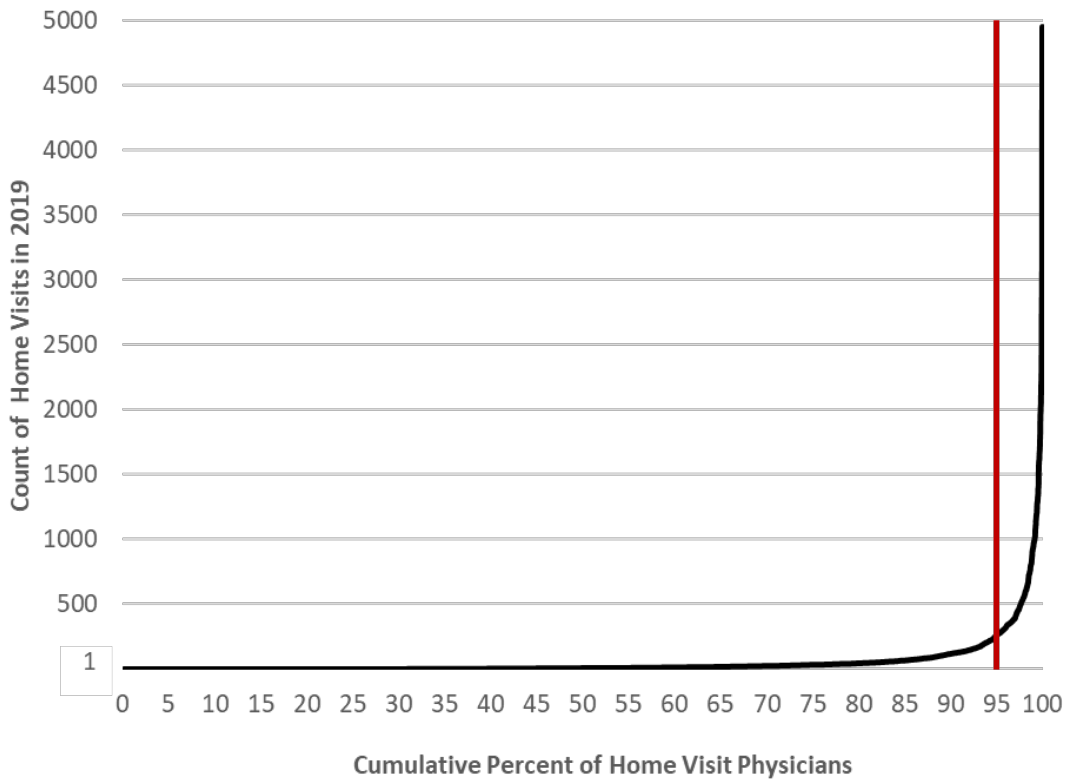

Note. Solid red line reflects the 95<sup>th</sup> cumulative percent of all home visit physicians.

**Figure S2:** Infographic of the Percentile of Home Visit Physicians by Volume and their Percent Share of Total Home Visits Provided in Ontario in 2019.

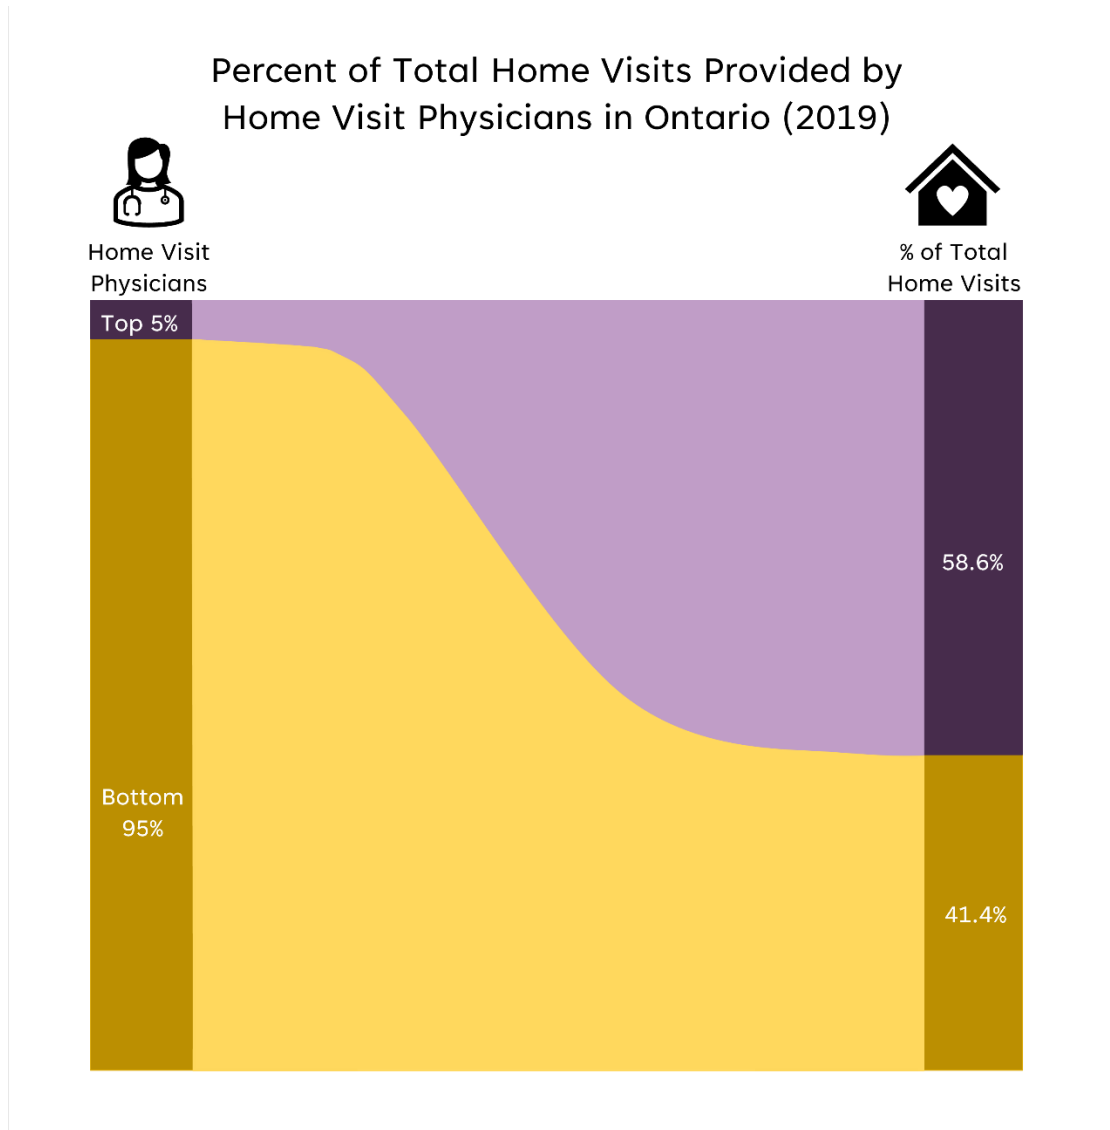

## References

1. Glazier RH, Kopp A, Schultz SE, Kiran T, Henry DA. All the right intentions but few of the desired results: lessons on access to primary care from Ontario's patient enrolment models. *Healthcare Q.* 2012;15:17–21.
2. Juurlink DN, Preyra C, Croxford R, Chong A, Austin PC, Tu JV, Laupacis A. Canadian Institute for Health Information Discharge Abstract Database: A Validation Study. Toronto, Ontario: Institute for Clinical Evaluative Sciences; 2006.
3. Jones A, Schumacher C, Bronskill SE, Campitelli MA, Poss JW, Seow H, Costa AP. The association between home care visits and same-day emergency department use: a case-crossover study. *Cmaj* 2018;190:E525-e531.
4. ICES. Physician Database (IPDB). In *ICES Data Dictionary*; 2018.
5. Rezaei M, Maclagan L, Donovan L, Tu JV. Classification of Canadian immigrants into visible minority groups using country of birth and mother tongue. *Open Medicine : A Peer-reviewed, Independent, Open-access Journal* 2013;7.
6. Canadian Institute for Health Information. *CIHI Data Quality Study of Ontario Emergency Department Visits for Fiscal Year 2004–2005—Executive Summary.* Ottawa; 2007.
7. ICES. Ontario Health Insurance Plan (OHIP). In *ICES Data Dictionary*; 2021.
8. ICES. Population and Demographic Data (RPDB). In *ICES Data Dictionary*; 2021.
